# Supplementary material for: MiR-21 and MiR-155 promote non-small cell lung cancer progression by downregulating SOCS1, SOCS6, and PTEN
Source: PubMed Central journal article supplement (PMC5356677; doi:10.18632/oncotarget.13022), 2016-11-02
Supplement: oncotarget-07-84508-s001.pdf [file oncotarget-07-84508-s001.pdf]

# MiR-21 and MiR-155 promote non-small cell lung cancer progression by downregulating *SOCS1*, *SOCS6*, and *PTEN*

## Supplementary Materials

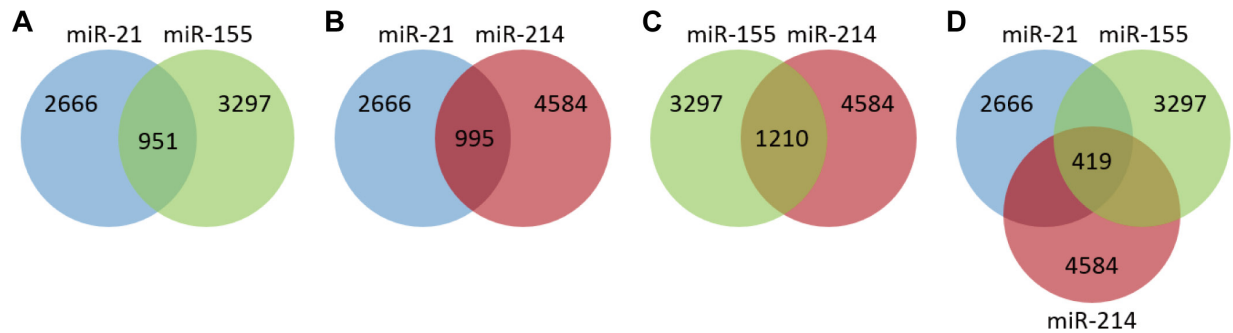

**Supplementary Figure S1: The overlapping predicted targets of miR-21, miR-155, and miR-214.** (A) The overlapping predicted targets of miR-21 and miR-155. (B) The overlapping predicted targets of miR-21 and miR-214. (C) The overlapping predicted targets of miR-155 and miR-214. (D) The overlapping predicted targets of miR-21, miR-155 and miR-214.

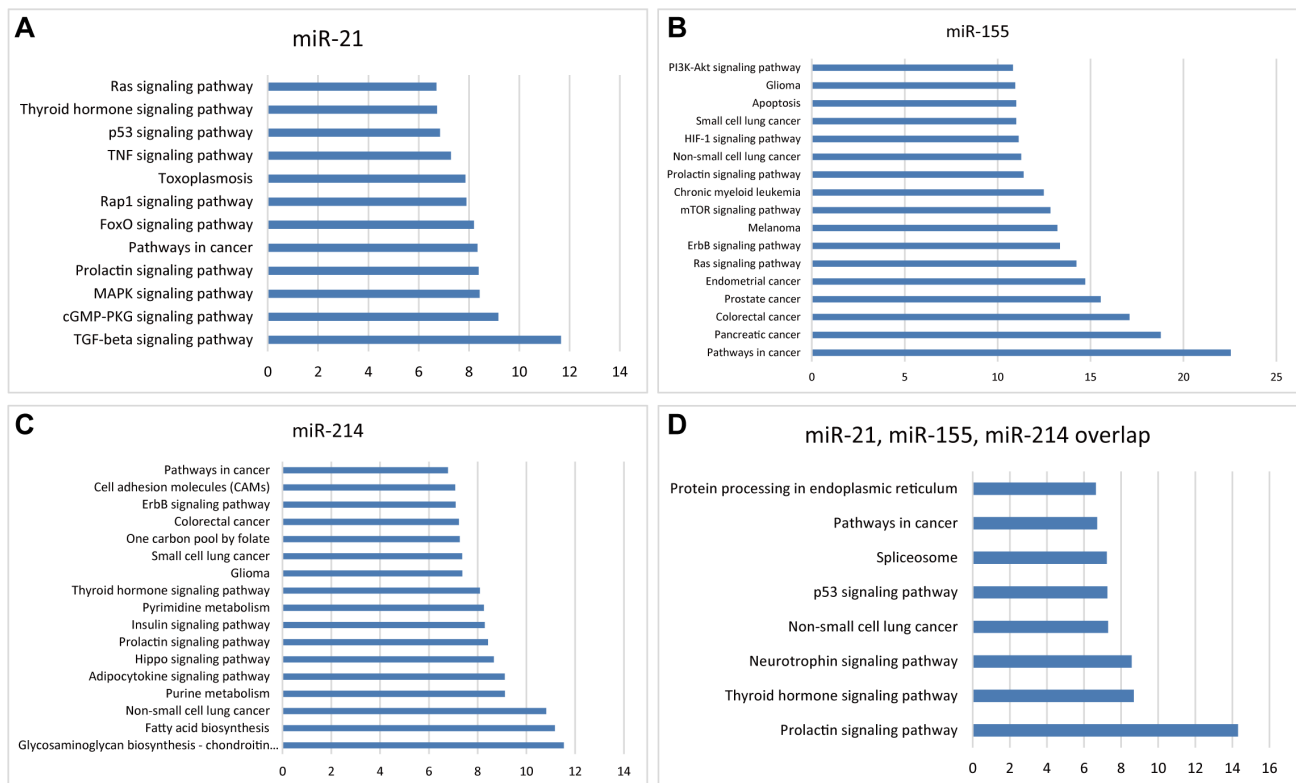

**Supplementary Figure S2: Pathway analysis of the predicted targets of miR-21, miR-155 and miR-214, and of the overlapping predicted targets of miR-21/155/214.** (A–C) Pathway analysis of the predicted targets of miR-21 (A), miR-155 (B) and miR-214 (C). (D) Pathway analysis of the overlapping predicted targets of miR-21/155/214.

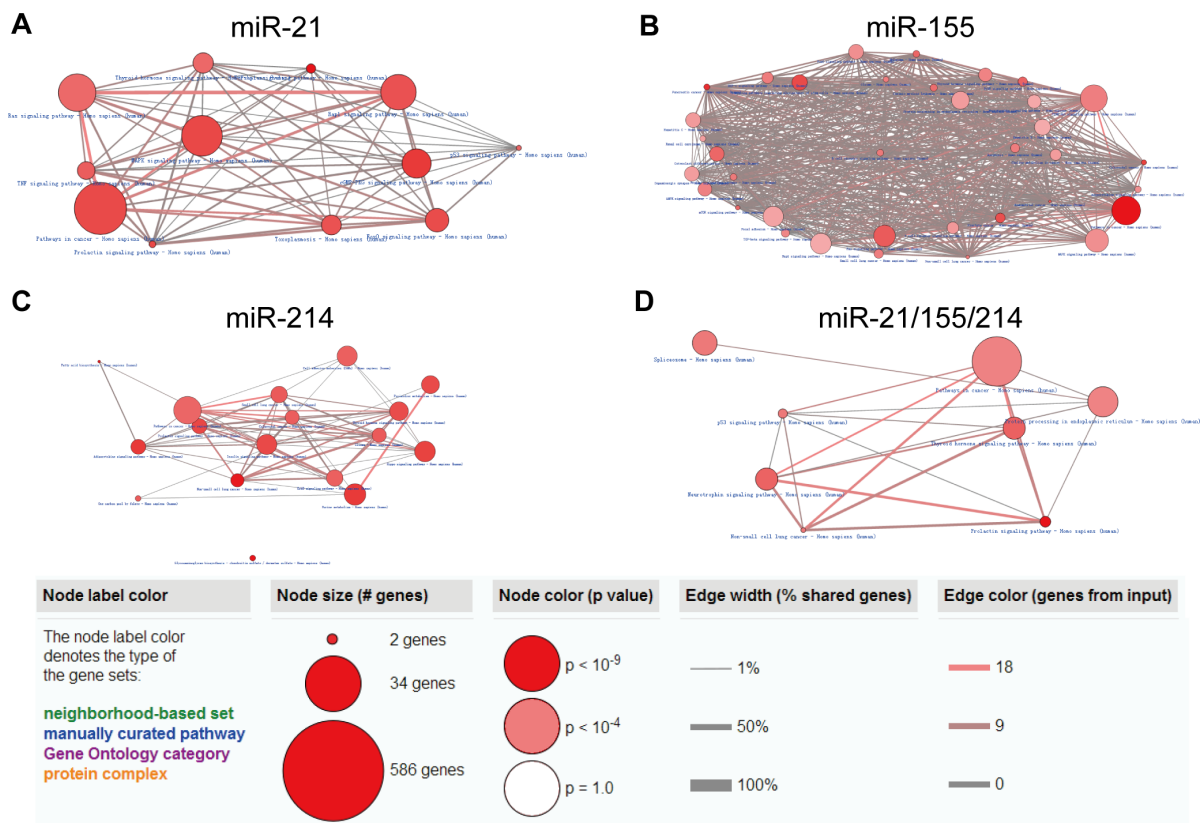

**Supplementary Figure S3: The regulation networks of the predicted targets of miR-21, miR-155, miR-214, and of the overlapping predicted targets of miR-21/155/214.** (A) The regulation network of the predicted targets of miR-21. (B) The regulation network of the predicted targets of miR-155. (C) The regulation network of the predicted targets of miR-214. (D) The regulation network of the overlapping predicted targets of miR-21/155/214.

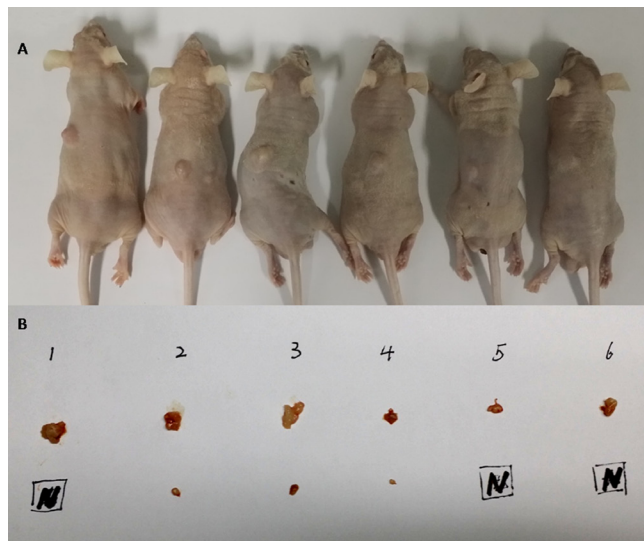

**Supplementary Figure S4: Treatment with miR-21 and miR-155 inhibitors obviously inhibited tumor growth.** (A) Treatment with miR-21 and miR-155 inhibitors obviously inhibited tumor growth *in vivo*. (B) Tumor size was measured after dissection.

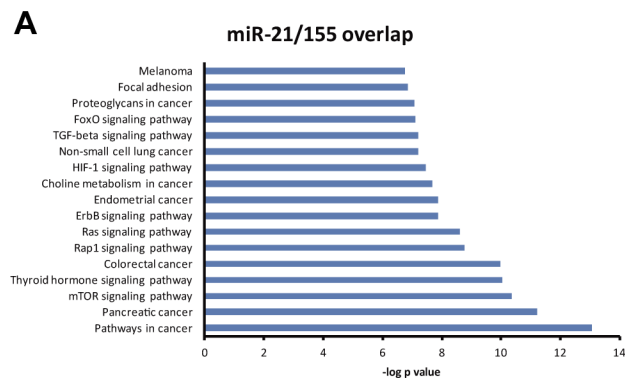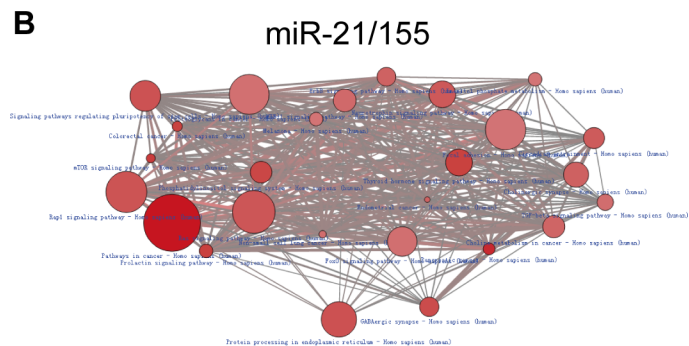

**Supplementary Figure S5: Pathway analysis and regulation network of the overlapping predicted targets of miR-21 and miR-155.** (A) Pathway analysis of the overlapping predicted targets of miR-21/155. (B) The regulation network of the overlapping predicted targets of miR-21/155.

**Supplementary Table S1: The sequences of primers of miRNAs and genes real time PCR**

| Name                      |         | 5'-3'                                                   |
|---------------------------|---------|---------------------------------------------------------|
| U6 RT                     |         | GTCGTATCCAGTGCAGGGTCCGAGGTATTTCGCACTGGATACGA<br>CAAAAAT |
| hsa-miR-21 RT             |         | GTCGTATCCAGTGCAGGGTCCGAGGTATTTCGCACTGGATACGAC<br>TCAACA |
| hsa-miR-155 RT            |         | GTCGTATCCAGTGCAGGGTCCGAGGTATTTCGCACTGGATACGAC<br>ACCCCT |
| hsa-miR-214 RT            |         | GTCGTATCCAGTGCAGGGTCCGAGGTATTTCGCACTGGATACGAC<br>ACTGCC |
| U6 real time PCR          | Forward | CGGCGGTCGTGAAGCGTTCCAT                                  |
|                           | Reverse | CCAGTGCAGGGTCCGAGGTAT                                   |
| hsa-miR-21 real time PCR  | Forward | CGGCGGTTAGCTTATCAGACTGA                                 |
|                           | Reverse | CCAGTGCAGGGTCCGAGGTAT                                   |
| hsa-miR-155 real time PCR | Forward | CGGCGGTTTAATGCTAATCGTGAT                                |
|                           | Reverse | CCAGTGCAGGGTCCGAGGTAT                                   |
| hsa-miR-214 real time PCR | Forward | CGGCGGTACAGCAGGCACAGACA                                 |
|                           | Reverse | CCAGTGCAGGGTCCGAGGTAT                                   |
| SOCS1 real time PCR       | Forward | GTAGGAGGTGCGAGTTCAGG                                    |
|                           | Reverse | GACCCCTTCTCACCTCTTGA                                    |
| SOCS6 real time PCR       | Forward | AGGAGCAGAGTTCGGATCAA                                    |
|                           | Reverse | ACCATTGCTACCTCCAATGC                                    |
| PTEN real time PCR        | Forward | TTGGCGGTGTCATAATGTCT                                    |
|                           | Reverse | GCAGAAAGACTTGAAGGCGTA                                   |
